# Supplementary material for: A ZIF-8 composite SiO2-enhanced high-performance PEO-based solid-state electrolyte for Li-metal batteries
Source: Royal Society of Chemistry journal article supplement (doi:10.1039/d2se01529c), 2023-01-01
Supplement: d2se01529c1.pdf [file d2se01529c1.pdf]

## Supporting Information

### ZIF-8 composite SiO<sub>2</sub> enhanced high-performance PEO-based solid-state electrolyte for Li-metal batteries

Furong Zhang <sup>a</sup>, Kunpeng Jiang <sup>a</sup>, Guisheng Zhu <sup>a\*</sup>, Huarui Xu <sup>a</sup>, Xiuyun Zhang <sup>a</sup>,  
Yunyun Zhao <sup>a</sup>, Yejun Zhang <sup>b</sup>, Qianbing Wang <sup>b</sup>, Pengfei Pang <sup>a</sup> and Aibing Yu <sup>c</sup>

<sup>a</sup> Engineering Research Center of Electronic Information Materials and Devices,  
Ministry of Education, Guangxi Key Laboratory of Information Materials, Guilin  
University of Electronic Technology, Guilin 541004, P.R. China.

<sup>b</sup> Division of Nanobiomedicine and i-Lab, Suzhou Institute of Nano-Tech and Nano-  
Bionics, Chinese Academy of Sciences, Suzhou 215123, China.

<sup>c</sup> ARC Hub for Computational Particle Technology, Monash University, Clayton,  
Victoria 3800, Australia.

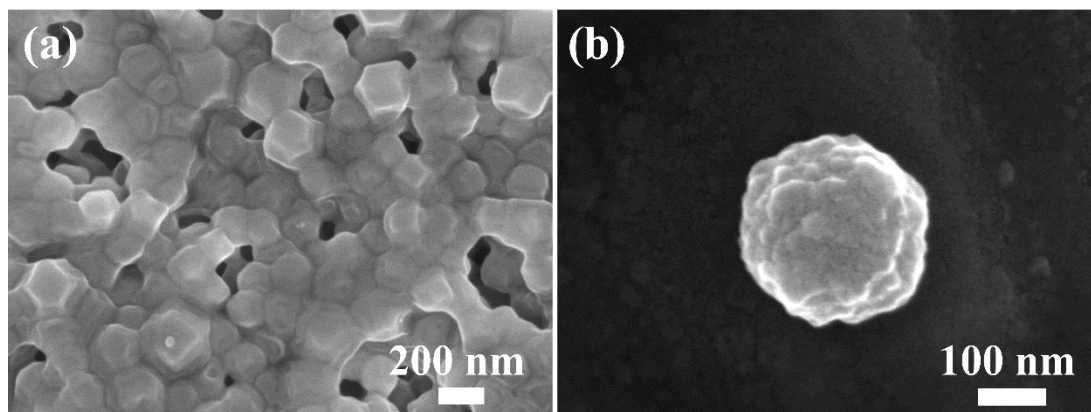

**Figure S1.** SEM images of (a) ZIF-8/IL and (b) ZIF-8/SiO<sub>2</sub>/IL.

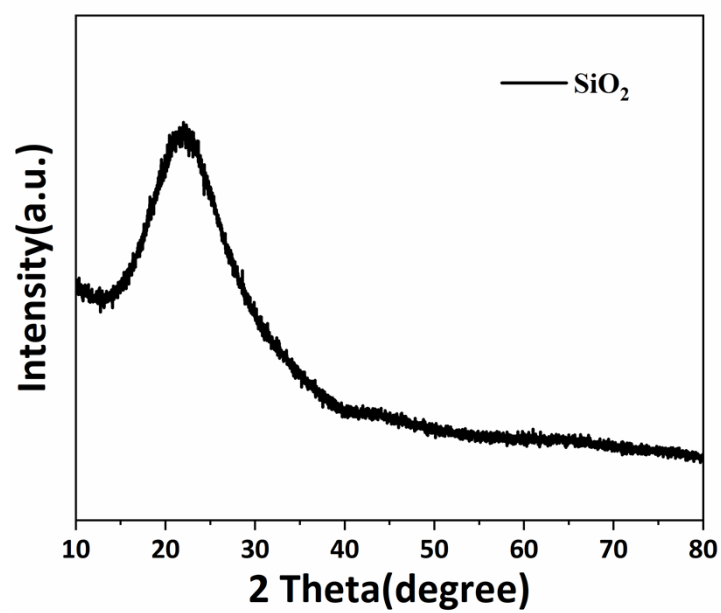

**Figure S2.** XRD pattern of SiO<sub>2</sub>.

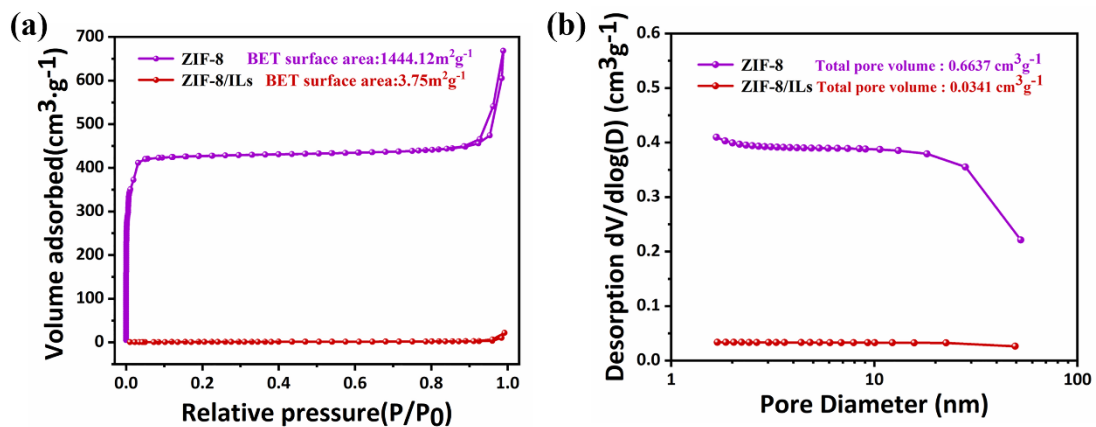

**Figure S3.** BET curves of (a) ZIF-8 and ZIF-8/IL. Pore size distribution of (b) ZIF-8 and ZIF-8/IL.

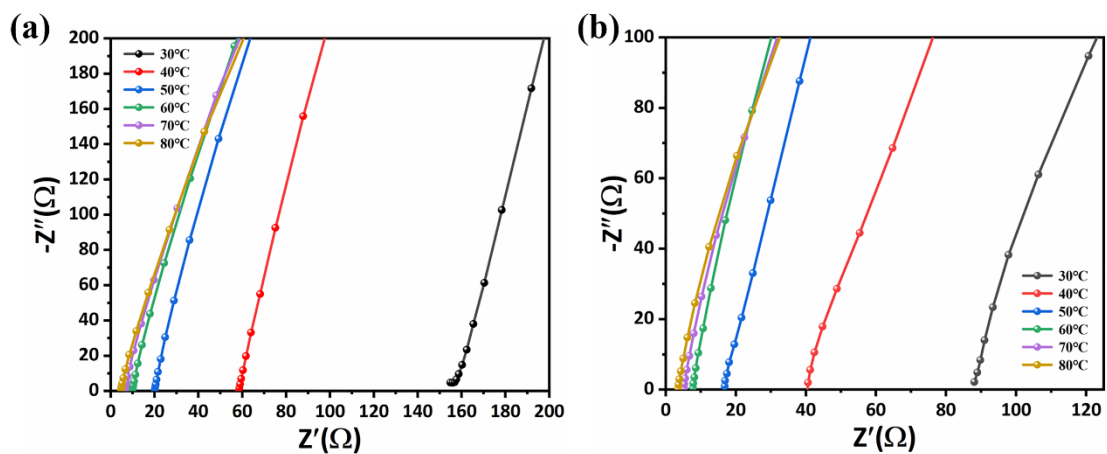

**Figure S4.** AC impedance spectra of (a) PZS-1 and (b) PZS-2, in the steel symmetrical cells at 30-80°C.

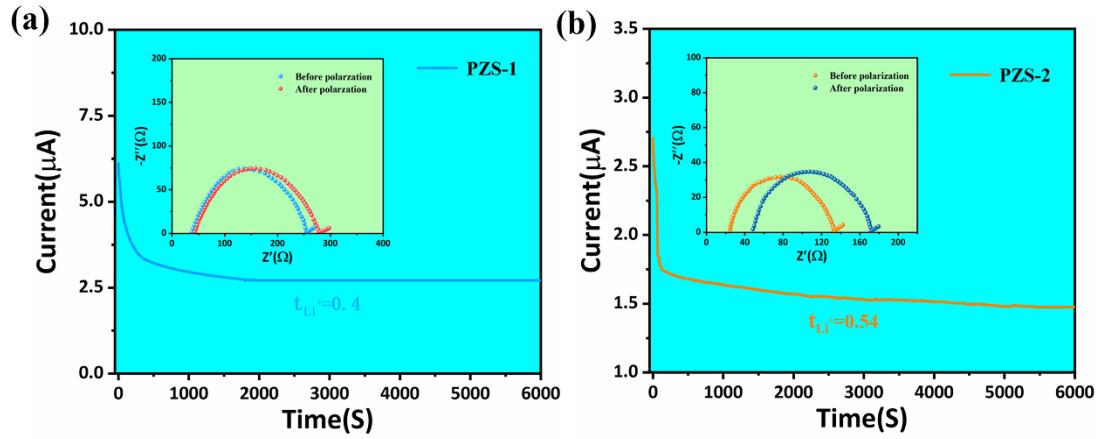

**Figure S5.** DC polarization curves of (a) PZS-1 and (b) PZS-2, in the Li symmetrical cell under 60°C at a potential step of 10 mV. Inset: the AC impedance spectra of the cell before polarization and after steady-state current conditions.

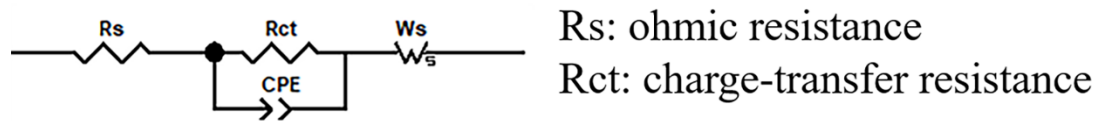

| Batteries    | Rs/Ω  | Rct/Ω |
|--------------|-------|-------|
| LFP/PZS-1/Li | 34.65 | 138.3 |
| LFP/PZS-2/Li | 17.71 | 83.36 |
| LFP/PZS-3/Li | 8.88  | 50.88 |

**Figure S6.** The equivalent circuit is used to fit the experimental data, the obtained data is shown in the table.

**Table S1** Summary of novel materials based on Li-ion composite solid-state electrolytes.

| No. | Composition                              | $\sigma$ (S cm <sup>-1</sup> )                      | Voltage window (V) | $t_{\text{Li}^+}$ | Ref                  |
|-----|------------------------------------------|-----------------------------------------------------|--------------------|-------------------|----------------------|
| 1   | PVA/BMIMOTf<br>/LLZTO                    | $2 \times 10^{-3}$ (60 °C)                          | 4                  | 0.76              | S1                   |
| 2   | PEO/PVDF<br>/LLZTO                       | $3.37 \times 10^{-4}$ (60 °C)                       | 4.8                | -                 | S2                   |
| 3   | PEO/LLZTO                                | $1.12 \times 10^{-5}$ (25 °C)                       | 5.5                | 0.58              | S3                   |
| 4   | PEO-n-UIO/IL                             | $1.3 \times 10^{-4}$ (30 °C)                        | 4.5                | 0.26              | S4                   |
| 5   | PEO-UIO-66-<br>NH <sub>2</sub>           | $3.1 \times 10^{-5}$ (25 °C)                        | 4.97               | 0.72              | S5                   |
| 6   | PTFE-ZIF-8/IE                            | $1.05 \times 10^{-4}$                               | 4.7                | 0.52              | S6                   |
| 7   | <b>PEO-ZIF-<br/>8@SiO<sub>2</sub>/IL</b> | <b><math>2.35 \times 10^{-4}</math> (30<br/>°C)</b> | <b>5.5</b>         | <b>0.6</b>        | <b>This<br/>work</b> |

## References

- S1. H. Jeon, H. A. Hoang and D. Kim, *J. Energy Chem.*, 2022, **74**, 128-139.
- S2. L. Li, Y. Deng, H. Duan, Y. Qian and G. Chen, *J. Energy Chem.*, 2022, **65**, 319-328.
- S3. C.-Z. Zhao, X.-Q. Zhang, X.-B. Cheng, R. Zhang, R. Xu, P.-Y. Chen, H.-J. Peng, J.-Q. Huang and Q. Zhang, *Proc. Natl. Acad. Sci. U. S. A.*, 2017, **114**, 11069-11074.
- S4. J. F. Wu and X. Guo, *J. Mater. Chem. A*, 2019, **7**, 2653-2659.
- S5. H. Y. Huo, B. Wu, T. Zhang, X. S. Zheng, L. Ge, T. W. Xu, X. X. Guo and X. L. Sun, *Energy Storage Mater.*, 2019, **18**, 59-67.
- S6. C. Sun, J. H. Zhang, X. F. Yuan, J. N. Duan, S. W. Deng, J. M. Fan, J. K. Chang, M. S. Zheng and Q. F. Dong, *#N/A*, 2019, **11**, 46671-46677.
